# Supplementary material for: Depletion of lamins B1 and B2 promotes chromatin mobility and induces differential gene expression by a mesoscale-motion-dependent mechanism
Source: PubMed Central journal article supplement (PMC10958841; doi:10.1186/s13059-024-03212-y), 2024-03-22
Supplement: 13059_2024_3212_MOESM2_ESM.pdf [file 13059_2024_3212_MOESM2_ESM.pdf]

## Supplementary Figures for

### **Depletion of lamins B1 and B2 promotes chromatin mobility and induces differential gene expression by a mesoscale-motion dependent mechanism**

Emily M. Pujadas Liwag, Xiaolong Wei, Nicolas Acosta, Lucas Carter, Jiekun Yang, Luay Almassalha, Surbhi Jain, Ali Daneshkhah, Suhas S.P. Rao, Fidan Seker-Polat, Kyle L. MacQuarrie, Joe Ibarra, Vasundhara Agrawal, Erez Lieberman Aiden, Masato T. Kanemaki, Vadim Backman, Mazhar Adli

**Fig. S1**

**A**

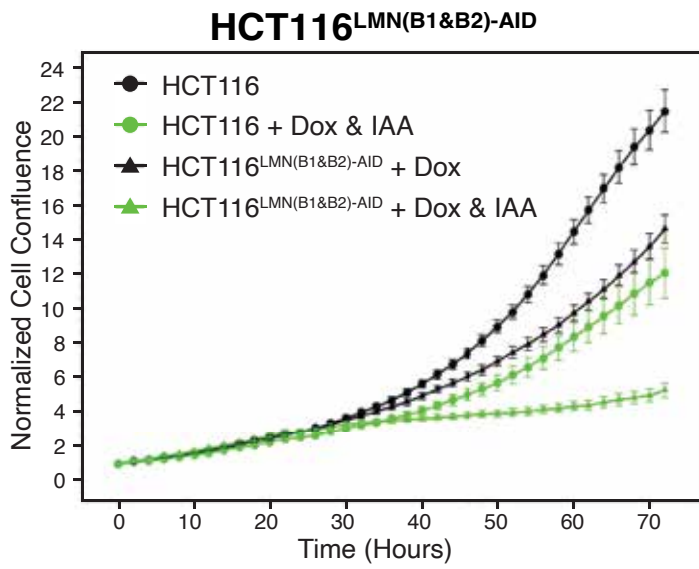

**B**

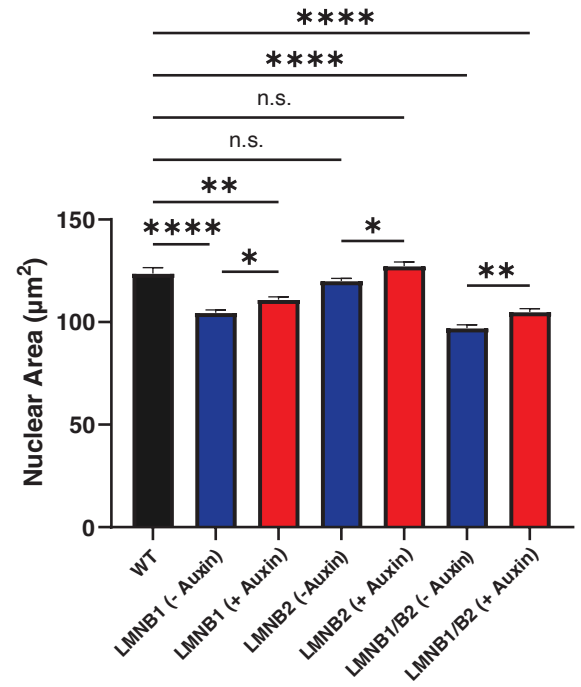

**C**

**Doxycycline + Auxin**

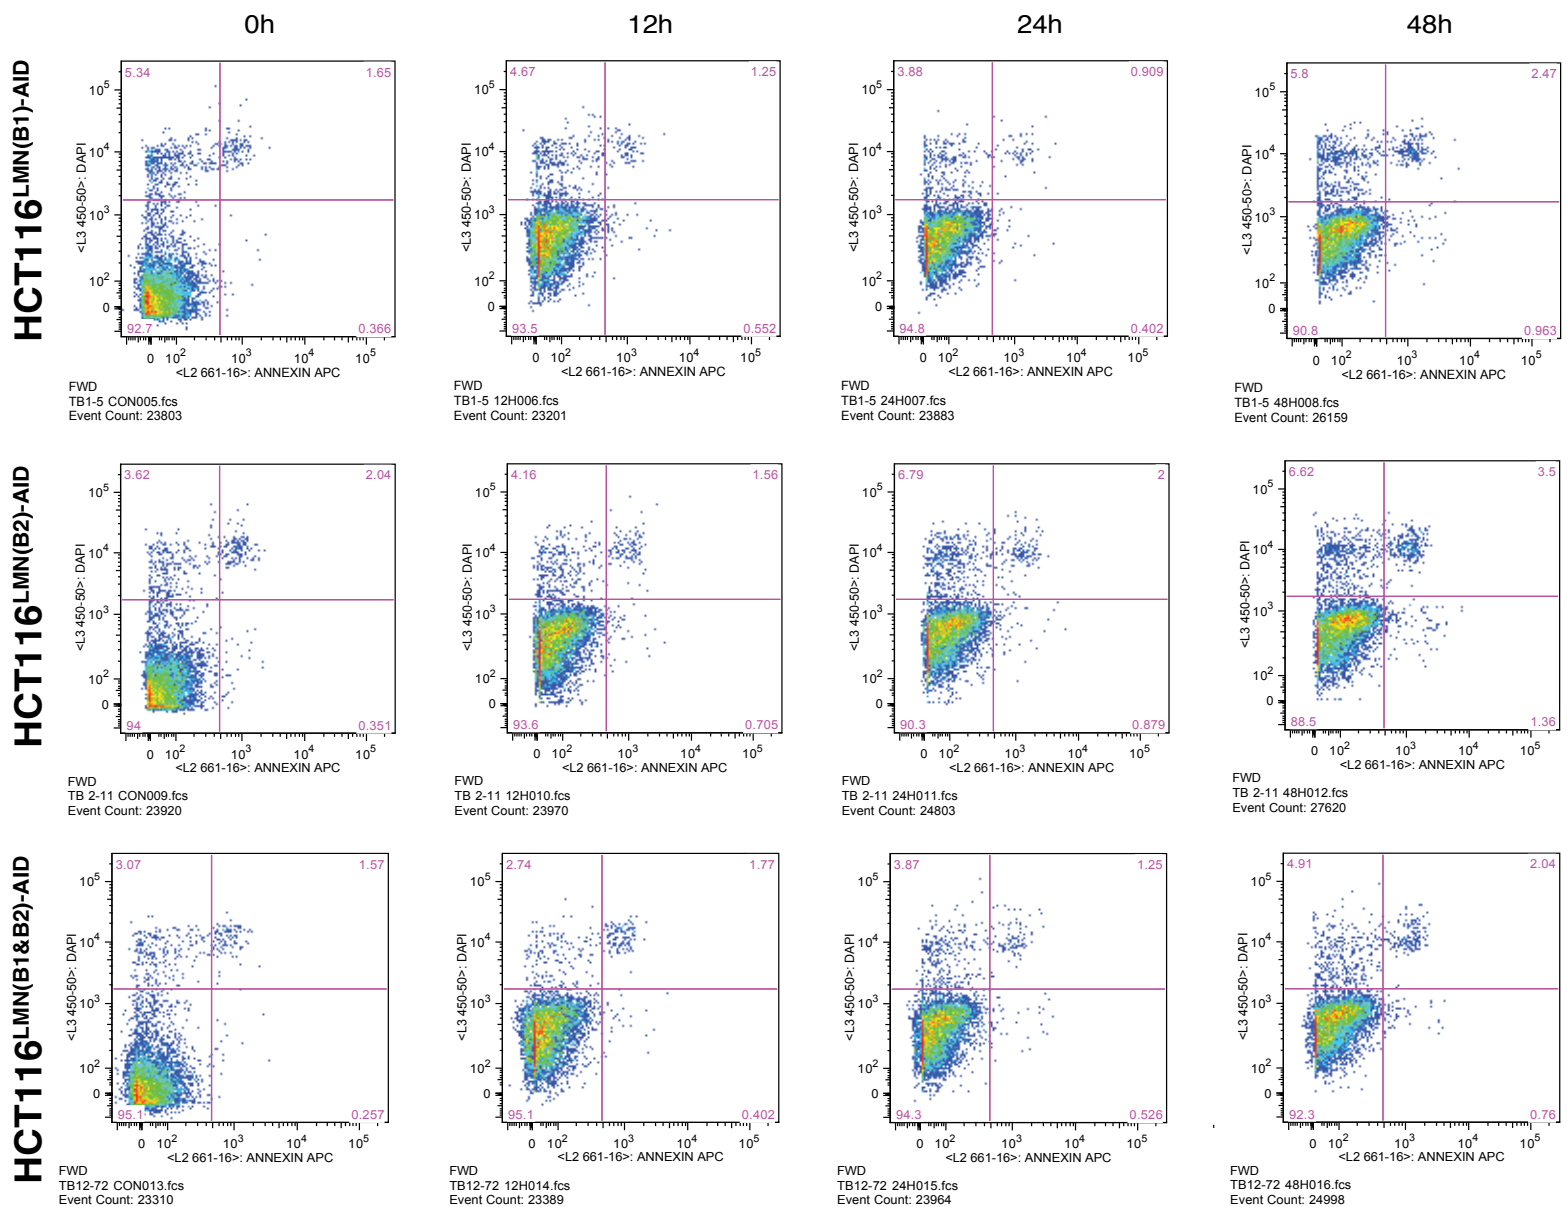

# Fig. S1

## Degradation of B-type lamins increases nuclear area but does not induce apoptosis.

- A. Time-course imaging in a 96-well plate using the Incucyte Live-Cell Analysis System to assess the growth rate of HCT116 and HCT116<sup>LMN(B1&B2)-AID</sup> cells. Growth rate data every 2 hours for a total of 72 hours (normalized to the 0-hour condition). We measured growth rates with and without the addition of doxycycline to induce TIR1, as well as with and without the addition of both doxycycline and auxin to degrade B-type lamins. Error bars: SEM. Data was compiled from three biological replicates (N = 3).
- B. Quantification of DAPI-stained area from fixed-cell immunofluorescence (Mean + SEM). Data was compiled from two independent biological replicates (N = 2). Significance was calculated by one-way ANOVA with Šidák's test for multiple comparisons (n.s. = not significant; \*<0.05; \*\*<0.01). WT HCT116 (Control n = 66), LMNB1 (Control n = 257; Auxin n = 289), LMNB2 (Control n = 272; Auxin n = 196), LMNB1/B2 (Control n = 209; Auxin n = 257).
- C. Auxin treatment to induce acute depletion of B-type lamins in HCT116<sup>LMN(B1)-AID</sup> cells, HCT116<sup>LMN(B2)-AID</sup> cells, and HCT116<sup>LMN(B1&B2)-AID</sup> cells does not substantially induce cell death. Viable, in-tact cells are present in the bottom left quadrant, dead cells are shown in the top right quadrant, and apoptotic cells are shown in the bottom right quadrant in the plots. At least 20,000 events were recorded during the experiment.

**Fig. S2**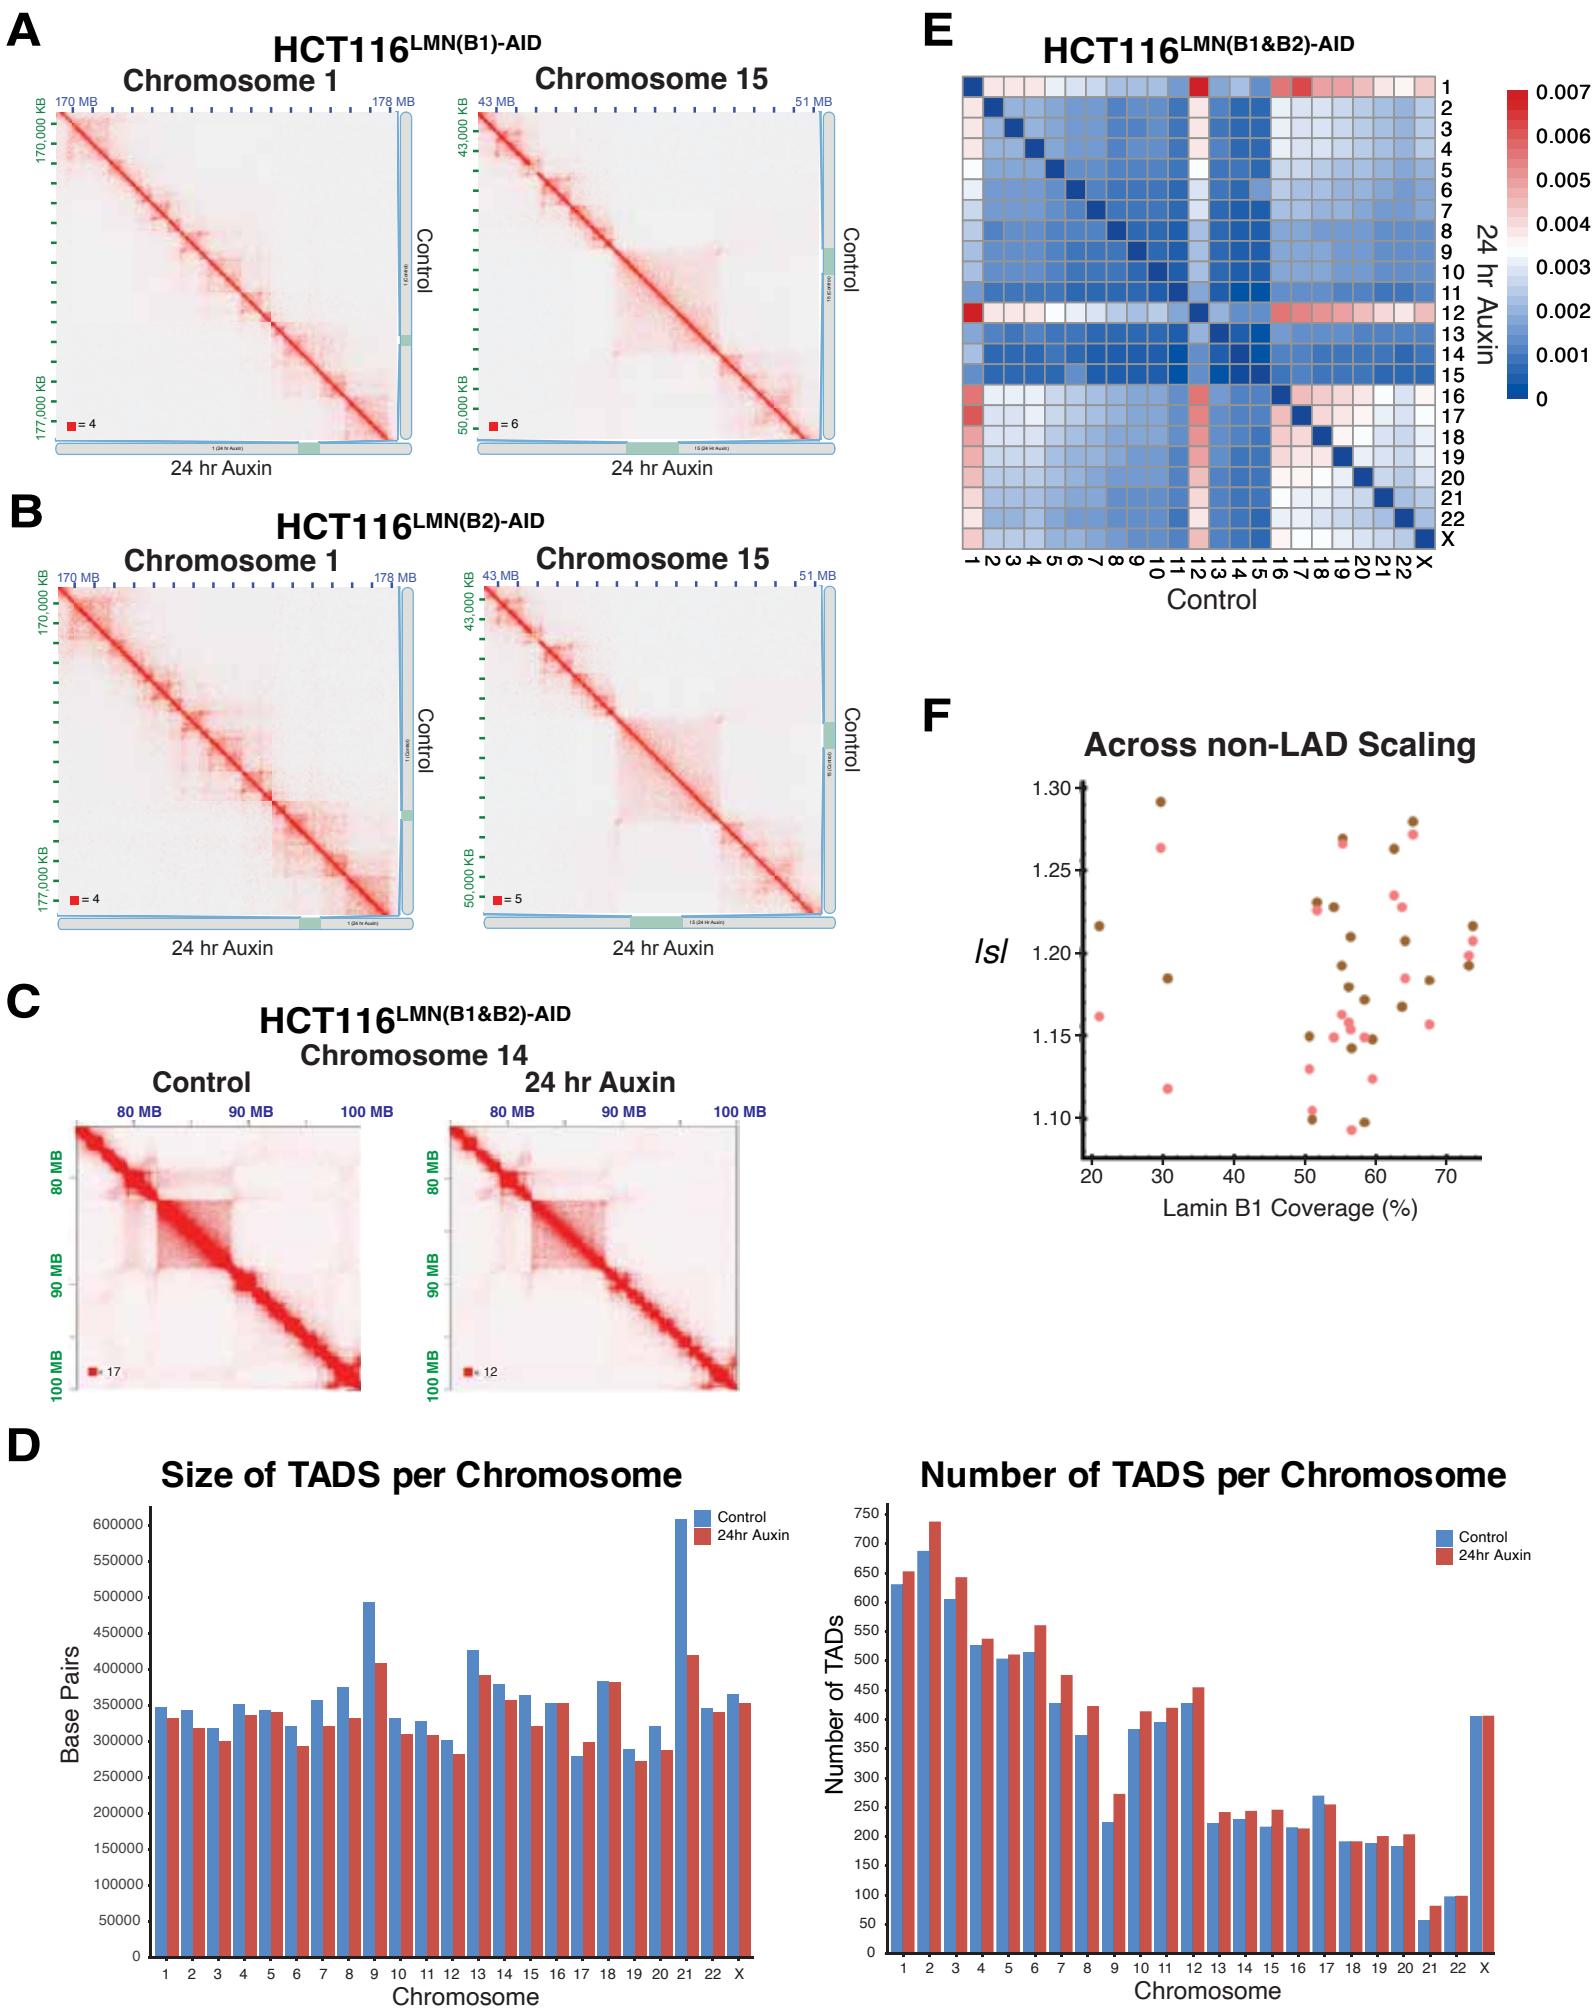

## Fig. S2

### The mesoscale structure of chromatin is overall preserved upon B-type lamin degradation.

- A. The normalized Hi-C trans-interaction matrices for chromosomes 1 and 15 in the control and 24-hour auxin treatment are shown for HCT116<sup>LMN(B1)-AID</sup> cells. 15 kb resolution.
- B. Normalized Hi-C trans-interaction matrices for chromosomes 1 and 15 in the control and 24-hour auxin treatment conditions for HCT116<sup>LMN(B2)-AID</sup> cells. 15 kb resolution.
- C. Normalized Hi-C interaction matrices for HCT116<sup>LMN(B12&B2)-AID</sup> cells for chromosome 14 at 50 kb resolution from 75 Mb to 100 Mb.
- D. TAD sizes for each chromosome for HCT116<sup>LMN(B1&B2)-AID</sup> cells in the control and 24-hour auxin treatment conditions.
- E. Normalized Hi-C trans-interaction matrix for the mean contact frequency, which is the ratio of observed/ expected interchromosomal contact frequency.
- F. Scatter plot for the relationship between lamin B1 coverage and  $lsl$  in non-LAD segments.

**Fig. S3****A**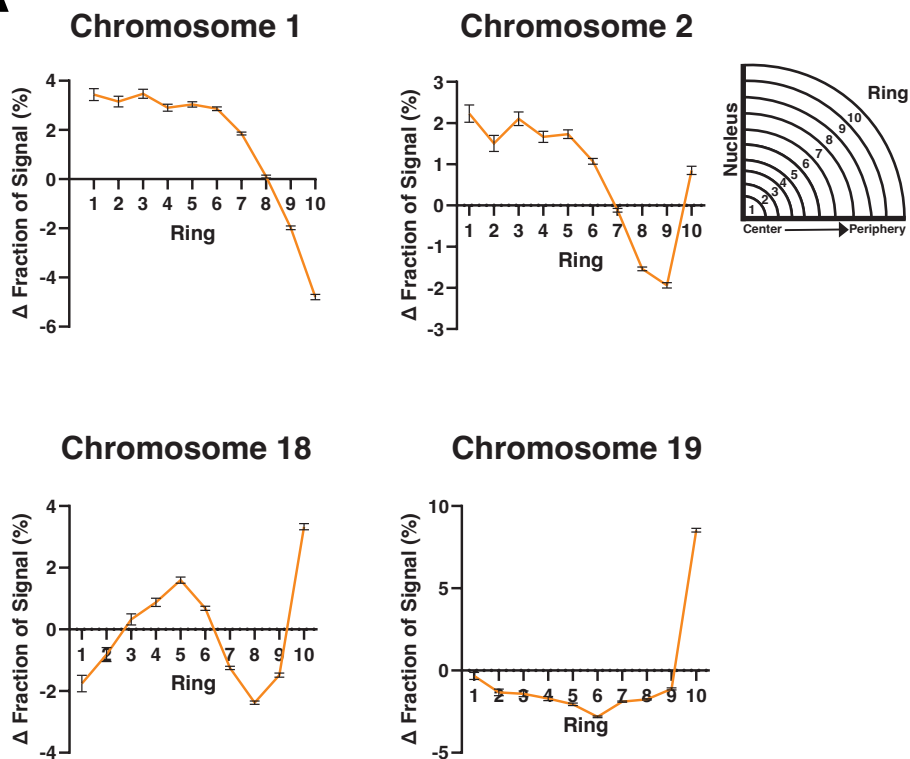**B**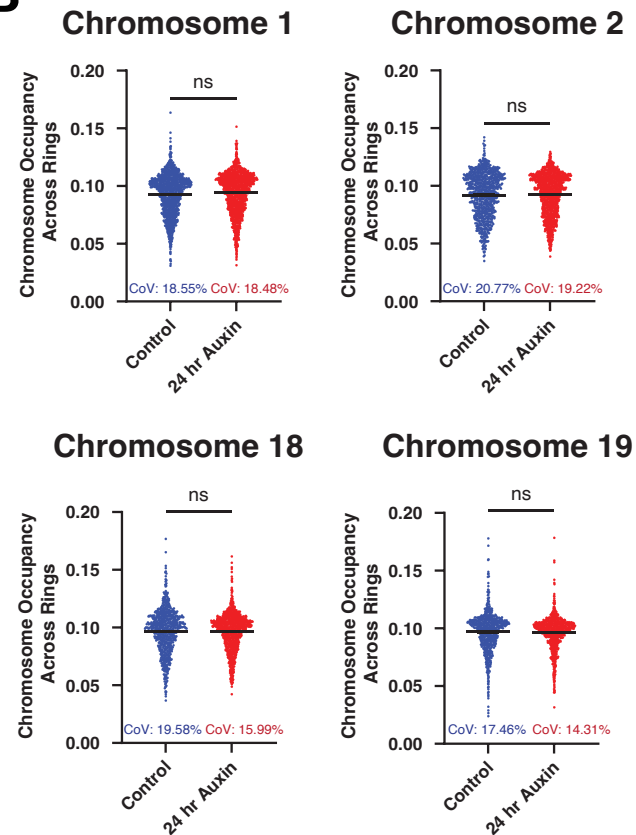**Fig. S3****Chromosome occupancy is shifted upon the addition of auxin.**

- A. Percent change between concentric rings for each chromosome and condition. Error bars: SD.
- B. Chromosome occupancy of nuclei in compiled rings before and after 24-hour auxin treatment. The coefficient of variation (CoV) for each condition and chromosome is obtained by dividing the standard by the mean and is expressed as a percentage. Data was compiled from three independent biological replicates ( $N = 3$ ). Significance was calculated by unpaired t test (n.s. = not significant). Chr. 1 (Control  $n = 1660$ ; Auxin  $n = 1960$ ), Chr. 2 (Control  $n = 1010$ ; Auxin  $n = 1740$ ), Chr. 18 (Control  $n = 890$ ; Auxin  $n = 1480$ ), Chr. 19 (Control  $n = 830$ ; Auxin  $n = 1200$ ). The violin plots extend from the minimum to the maximum value. The line in the middle of each plot is the median value of the distribution, and the lines above and below are the third and first quartiles, respectively. Each dot represents one cell.

**Fig. S4****A**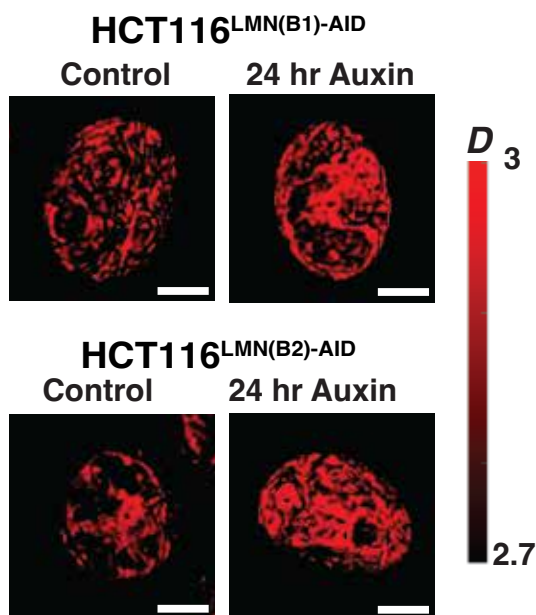**C**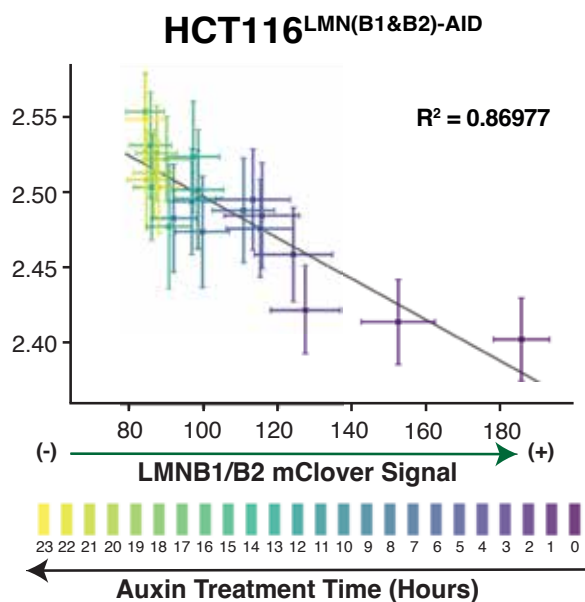**D**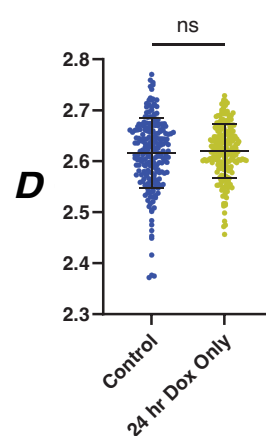**B**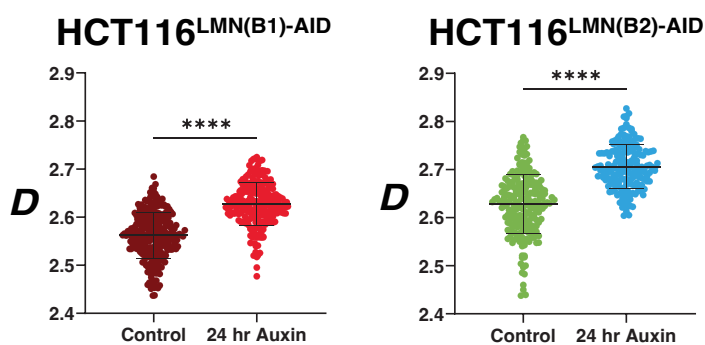**G**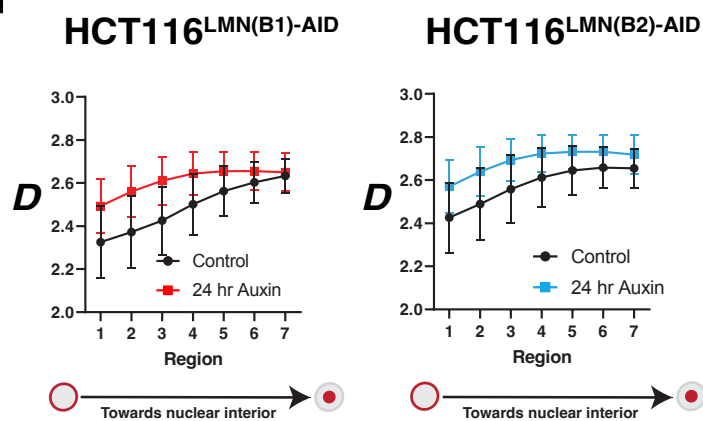**E**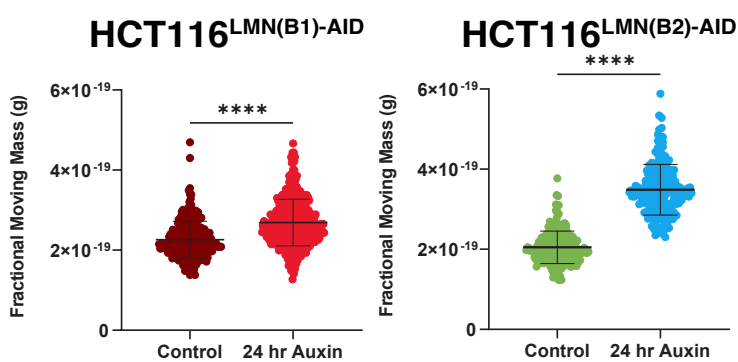**H**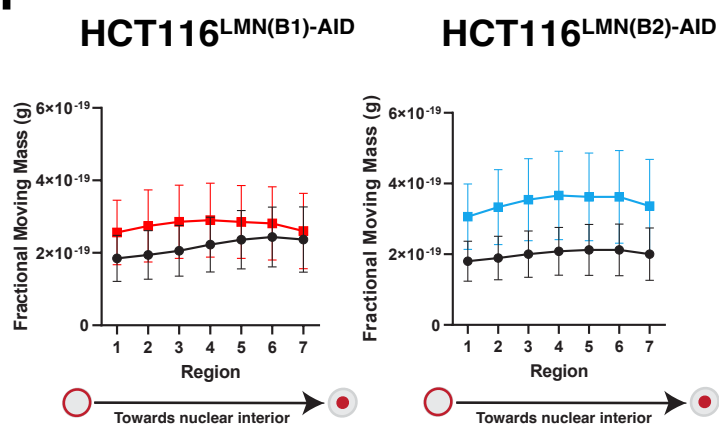**F**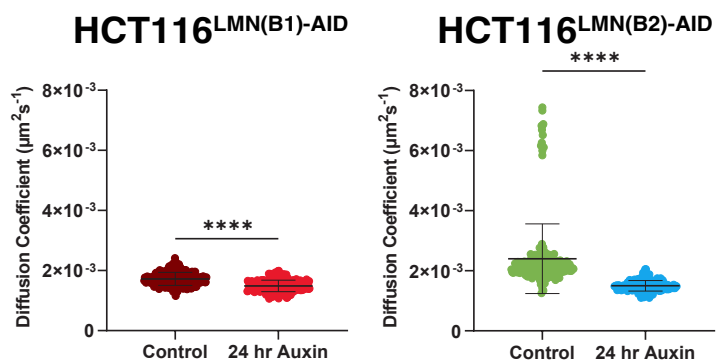**I**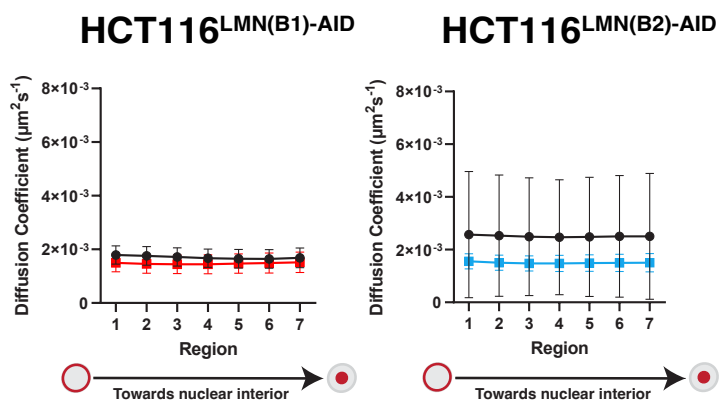

## Fig. S4

### Dual-PWS reveals differential higher-order chromatin structure and dynamics upon B-type lamin loss.

- A. Representative PWS images of HCT116<sup>LMN(B1)-AID</sup> cells and HCT116<sup>LMN(B2)-AID</sup> cells before and after 24-hour auxin treatment. Scale bar = 5  $\mu$ m. Data are representative of three independent biological replicates (N = 3).
- B. Violin plots for D in HCT116<sup>LMN(B1)-AID</sup> cells and HCT116<sup>LMN(B2)-AID</sup> cells before and after 24-hour auxin treatment.
- C. Live-cell PWS 24-hour auxin treatment time course in HCT116<sup>LMN(B1&B2)-AID</sup> cells. Error bars: SD. Data are representative of three independent biological replicates (N = 3; n = 634).
- D. Doxycycline treatment does not alter D in HCT116<sup>LMN(B1&B2)-AID</sup> cells. Data was compiled from three independent biological replicates (N = 3). Significance was calculated by unpaired t test with Welch's correction applied (n.s. = not significant). (Control n = 507; Auxin n = 519).
- E. Violin plots for fractional moving mass in HCT116<sup>LMN(B1)-AID</sup> cells and HCT116<sup>LMN(B2)-AID</sup> cells before and after 24-hour auxin treatment.
- F. Violin plots for diffusion coefficient in HCT116<sup>LMN(B1)-AID</sup> cells and HCT116<sup>LMN(B2)-AID</sup> cells before and after 24-hour auxin treatment.
- G. Regional PWS measurements of D in HCT116<sup>LMN(B1)-AID</sup> cells and HCT116<sup>LMN(B2)-AID</sup> cells before and after 24-hour auxin treatment.
- H. Regional PWS measurements of fractional moving mass in HCT116<sup>LMN(B1)-AID</sup> cells and HCT116<sup>LMN(B2)-AID</sup> cells before and after 24-hour auxin treatment.
- I. Regional PWS measurements of diffusion coefficient for HCT116<sup>LMN(B1)-AID</sup> cells and HCT116<sup>LMN(B2)-AID</sup> cells before and after 24-hour auxin treatment.

For A-B and E-I: Data was compiled from three independent biological replicates (N = 3). Significance was calculated by unpaired t test with Welch's correction applied (\*\*\*\* < 0.0001). Lamin B1 (Control n = 694; Auxin n = 585), Lamin B2 (Control n = 568; Auxin n = 525). Violin plots extend from the minimum to the maximum value. The line in the middle of each plot is the median value of the distribution, and the lines above and below are the third and first quartiles, respectively. Each dot represents one cell.



**Fig. S5****A**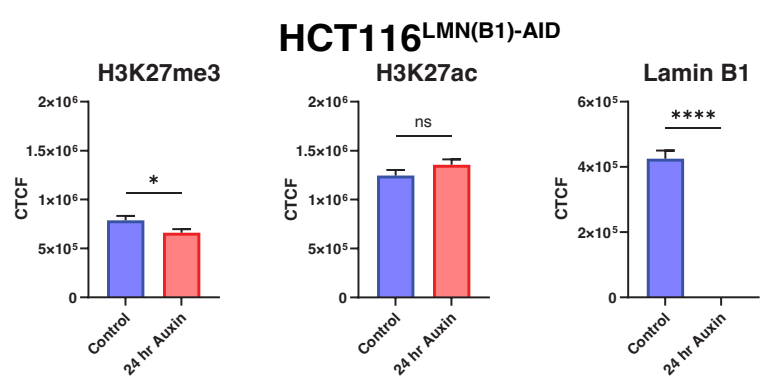**B**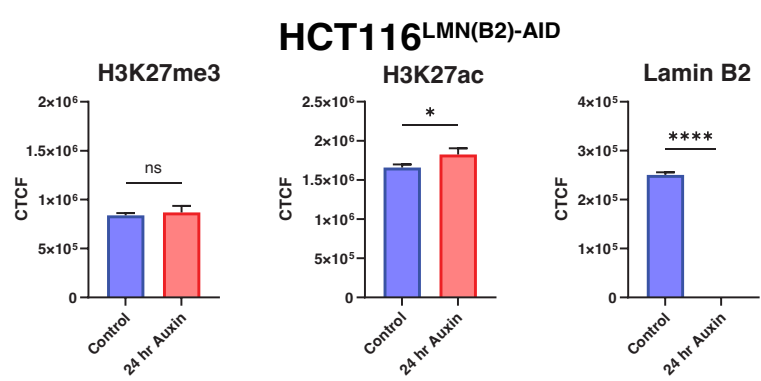**C**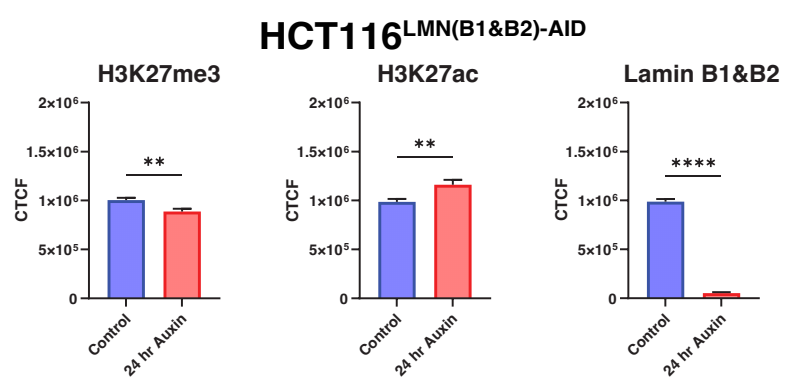**D**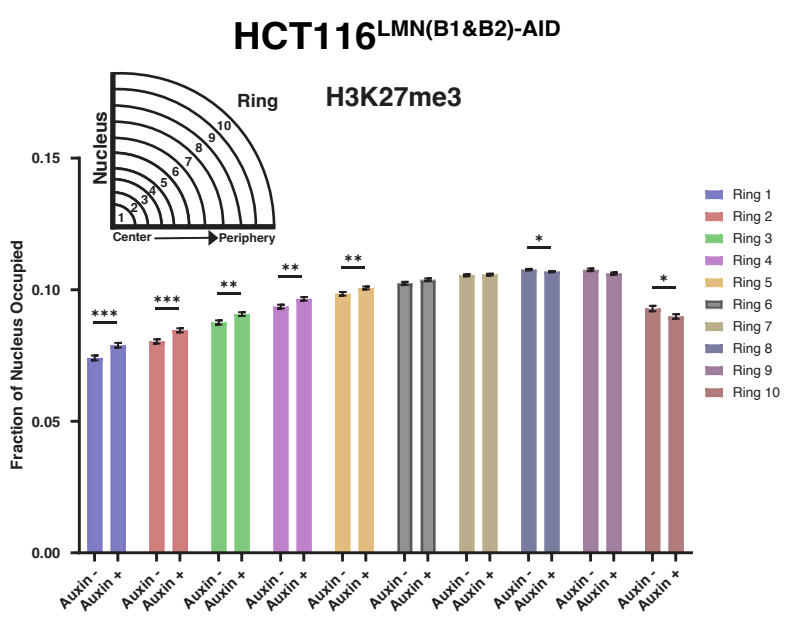**E**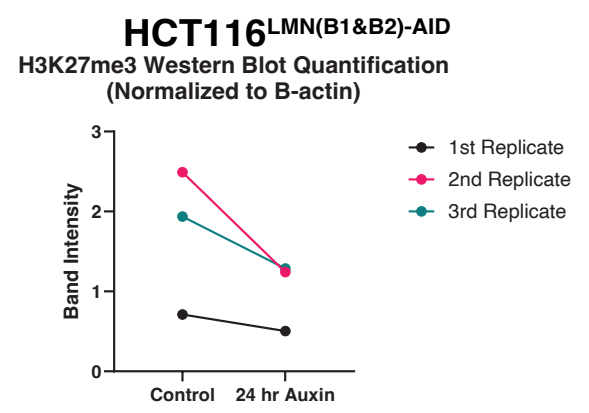**F**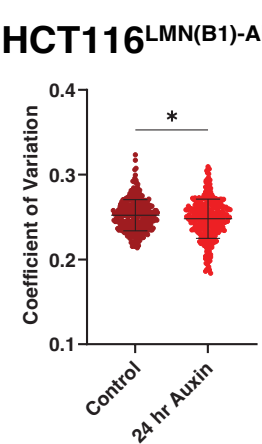**G**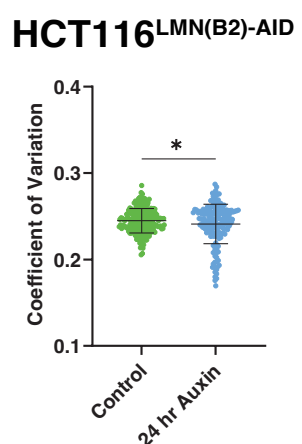

## Fig. S5

### Chromatin decompaction promotes redistribution of heterochromatic marks.

- A. Bar plots of H3K27me3, H3K27ac, and Lamin B1 corrected total cell fluorescence in HCT116<sup>LMN(B1)-AID</sup> cells before and after 24-hour auxin treatment (Mean + SEM). (Control n = 281; 24-hr Auxin n = 193).
- B. Bar plots of H3K27me3, H3K27ac, and Lamin B2 corrected total cell fluorescence in HCT116<sup>LMN(B2)-AID</sup> cells before and after 24-hour auxin treatment (Mean + SEM). (Control n = 249; 24-hr Auxin n = 152).
- C. Bar plots of H3K27me3, H3K27ac, and Lamin B1&B2 corrected total cell fluorescence in HCT116<sup>LMN(B1&B2)-AID</sup> cells before and after 24-hour auxin treatment (Mean + SEM). (Control n = 383; 24-hr Auxin n = 367).
- D. Graphing of the average fraction and SEM of H3K27me3 and H3K27ac fluorescent signals present in each one of ten concentric nuclear rings. Data was compiled from two independent biological replicates (N = 2). Significance was calculated by unpaired t test (\*<0.05; \*\*<0.01; \*\*\*<0.001; \*\*\*\*<0.0001). (H3K27me3 (Control n = 455; Auxin n = 510), H3K27ac (Control n = 448; Auxin n = 447)).
- E. Western blot analysis for H3K27me3 in HCT116<sup>LMN(B1&B2)-AID</sup> cells. GAPDH was used as a loading control. Three independent biological replicates (N = 3) are shown.
- F. Coefficient of variation plot for HCT116<sup>LMN(B1)-AID</sup> cells showing chromatin decompaction upon 24 hours of auxin treatment. (Control n = 770; Auxin n = 492).
- G. Coefficient of variation plot for HCT116<sup>LMN(B2)-AID</sup> cells. (Control n = 650; Auxin n = 393).

For A-C and F-G: Data was compiled from three independent biological replicates (N = 3). Significance was calculated by unpaired t test (n.s. = not significant; \*<0.05; \*\*<0.01; \*\*\*<0.001; \*\*\*\*<0.0001).

For F-G: Violin plots extend from the minimum to the maximum value. The line in the middle of each plot is the median value of the distribution, and the lines above and below are the third and first quartiles, respectively.

Fig. S6

A

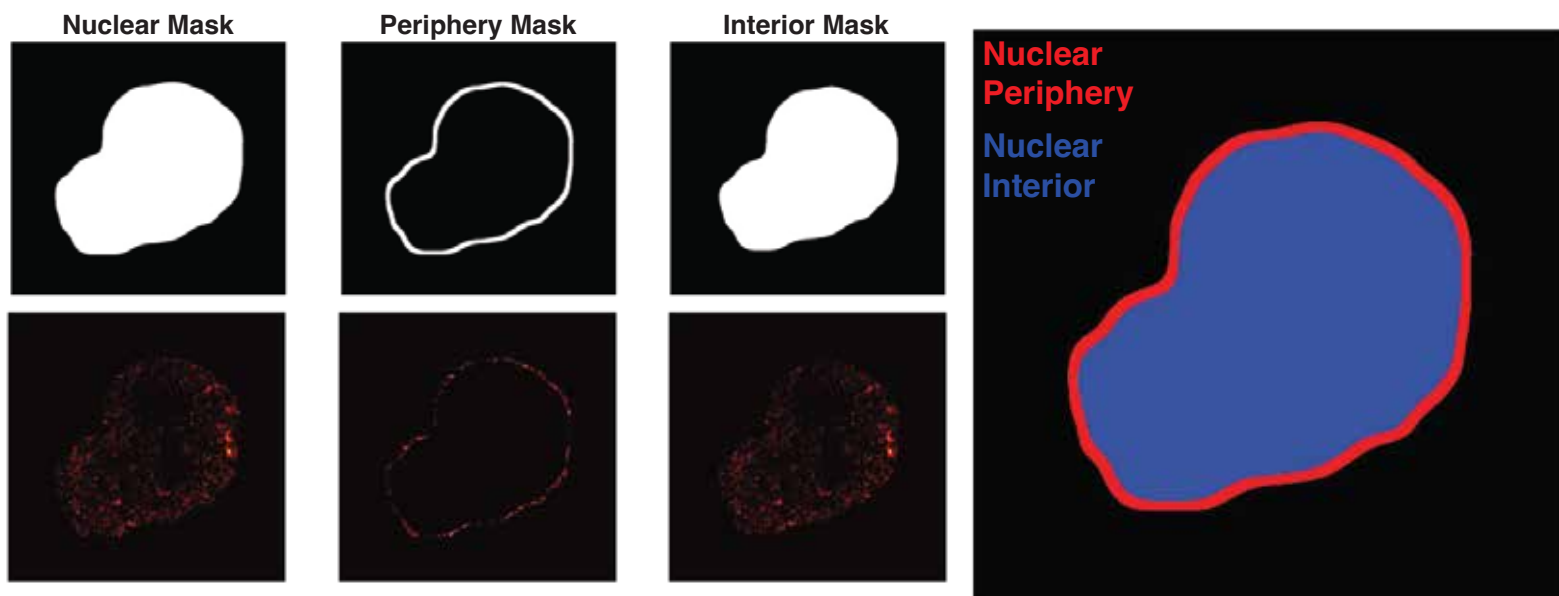

B

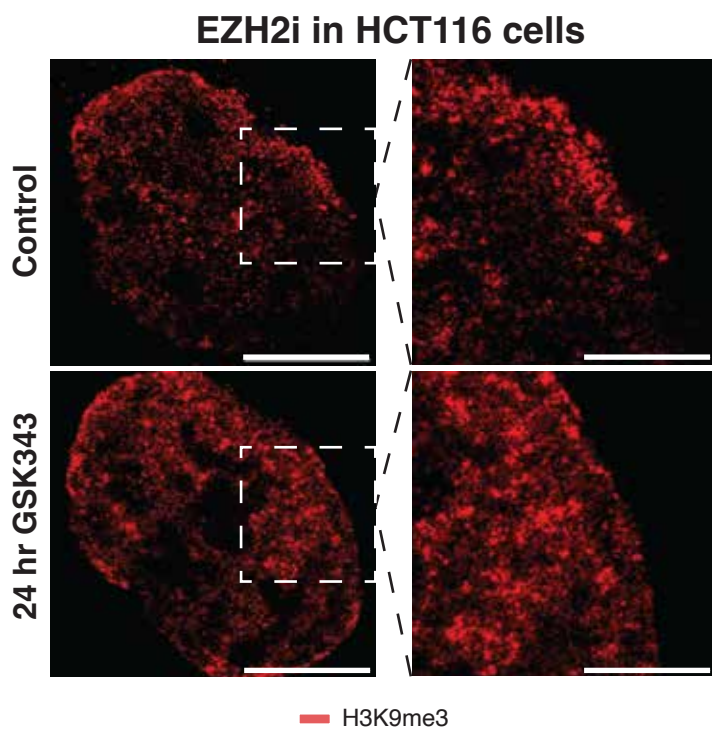

C

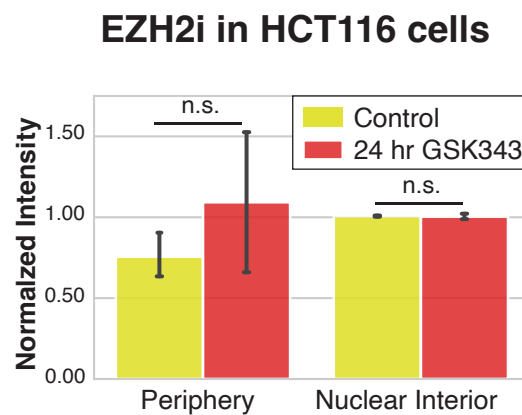

D

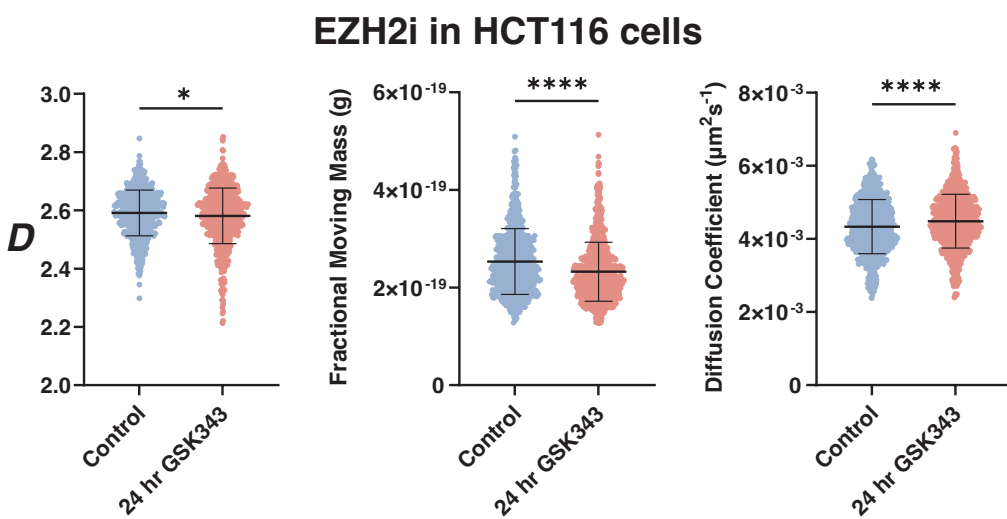

## Fig. S6

### SMLM allows sub-diffraction resolution to assess heterochromatin redistribution without perturbing B-type lamins.

- A. Example of Normalized STORM Intensity (NSI) analysis pipeline. Top: Representative images of binary masks used to specify the regions of interest for NSI analysis. Bottom: Representative masked HCT116<sup>LMN(B1&B2)-AID</sup> nucleus corresponding to the binary masks above. Right: Overlay of the nuclear interior and periphery masks in blue and red, respectively.
- B. STORM images of HCT116 cells after 24-hour GSK343 treatment (10  $\mu$ M) compared to the vehicle control (DMSO). Scale bars = 5  $\mu$ m, Scale bars (zoom) = 2  $\mu$ m.
- C. Quantification of NSI after EZH2 inhibition. Error bars: SD. Significance was calculated by unpaired t test (n.s. = not significant). (Control n = 4; GSK343 n = 5).
- D. Violin plots for D, fractional moving mass, and the diffusion coefficient in HCT116 cells after 24-hour GSK343 treatment (10mM) compared to the vehicle control (DMSO). Data was compiled from three independent biological replicates (N = 3). Significance was calculated by unpaired t test (\*<0.05; \*\*\*\*<0.0001). (Control n = 707; Auxin n = 807). The truncated violin plots extend from the minimum to the maximum value. The line in the middle of each plot is the median value of the distribution, and the lines above and below are the third and first quartiles, respectively. Each dot represents one cell.

**Fig. S7**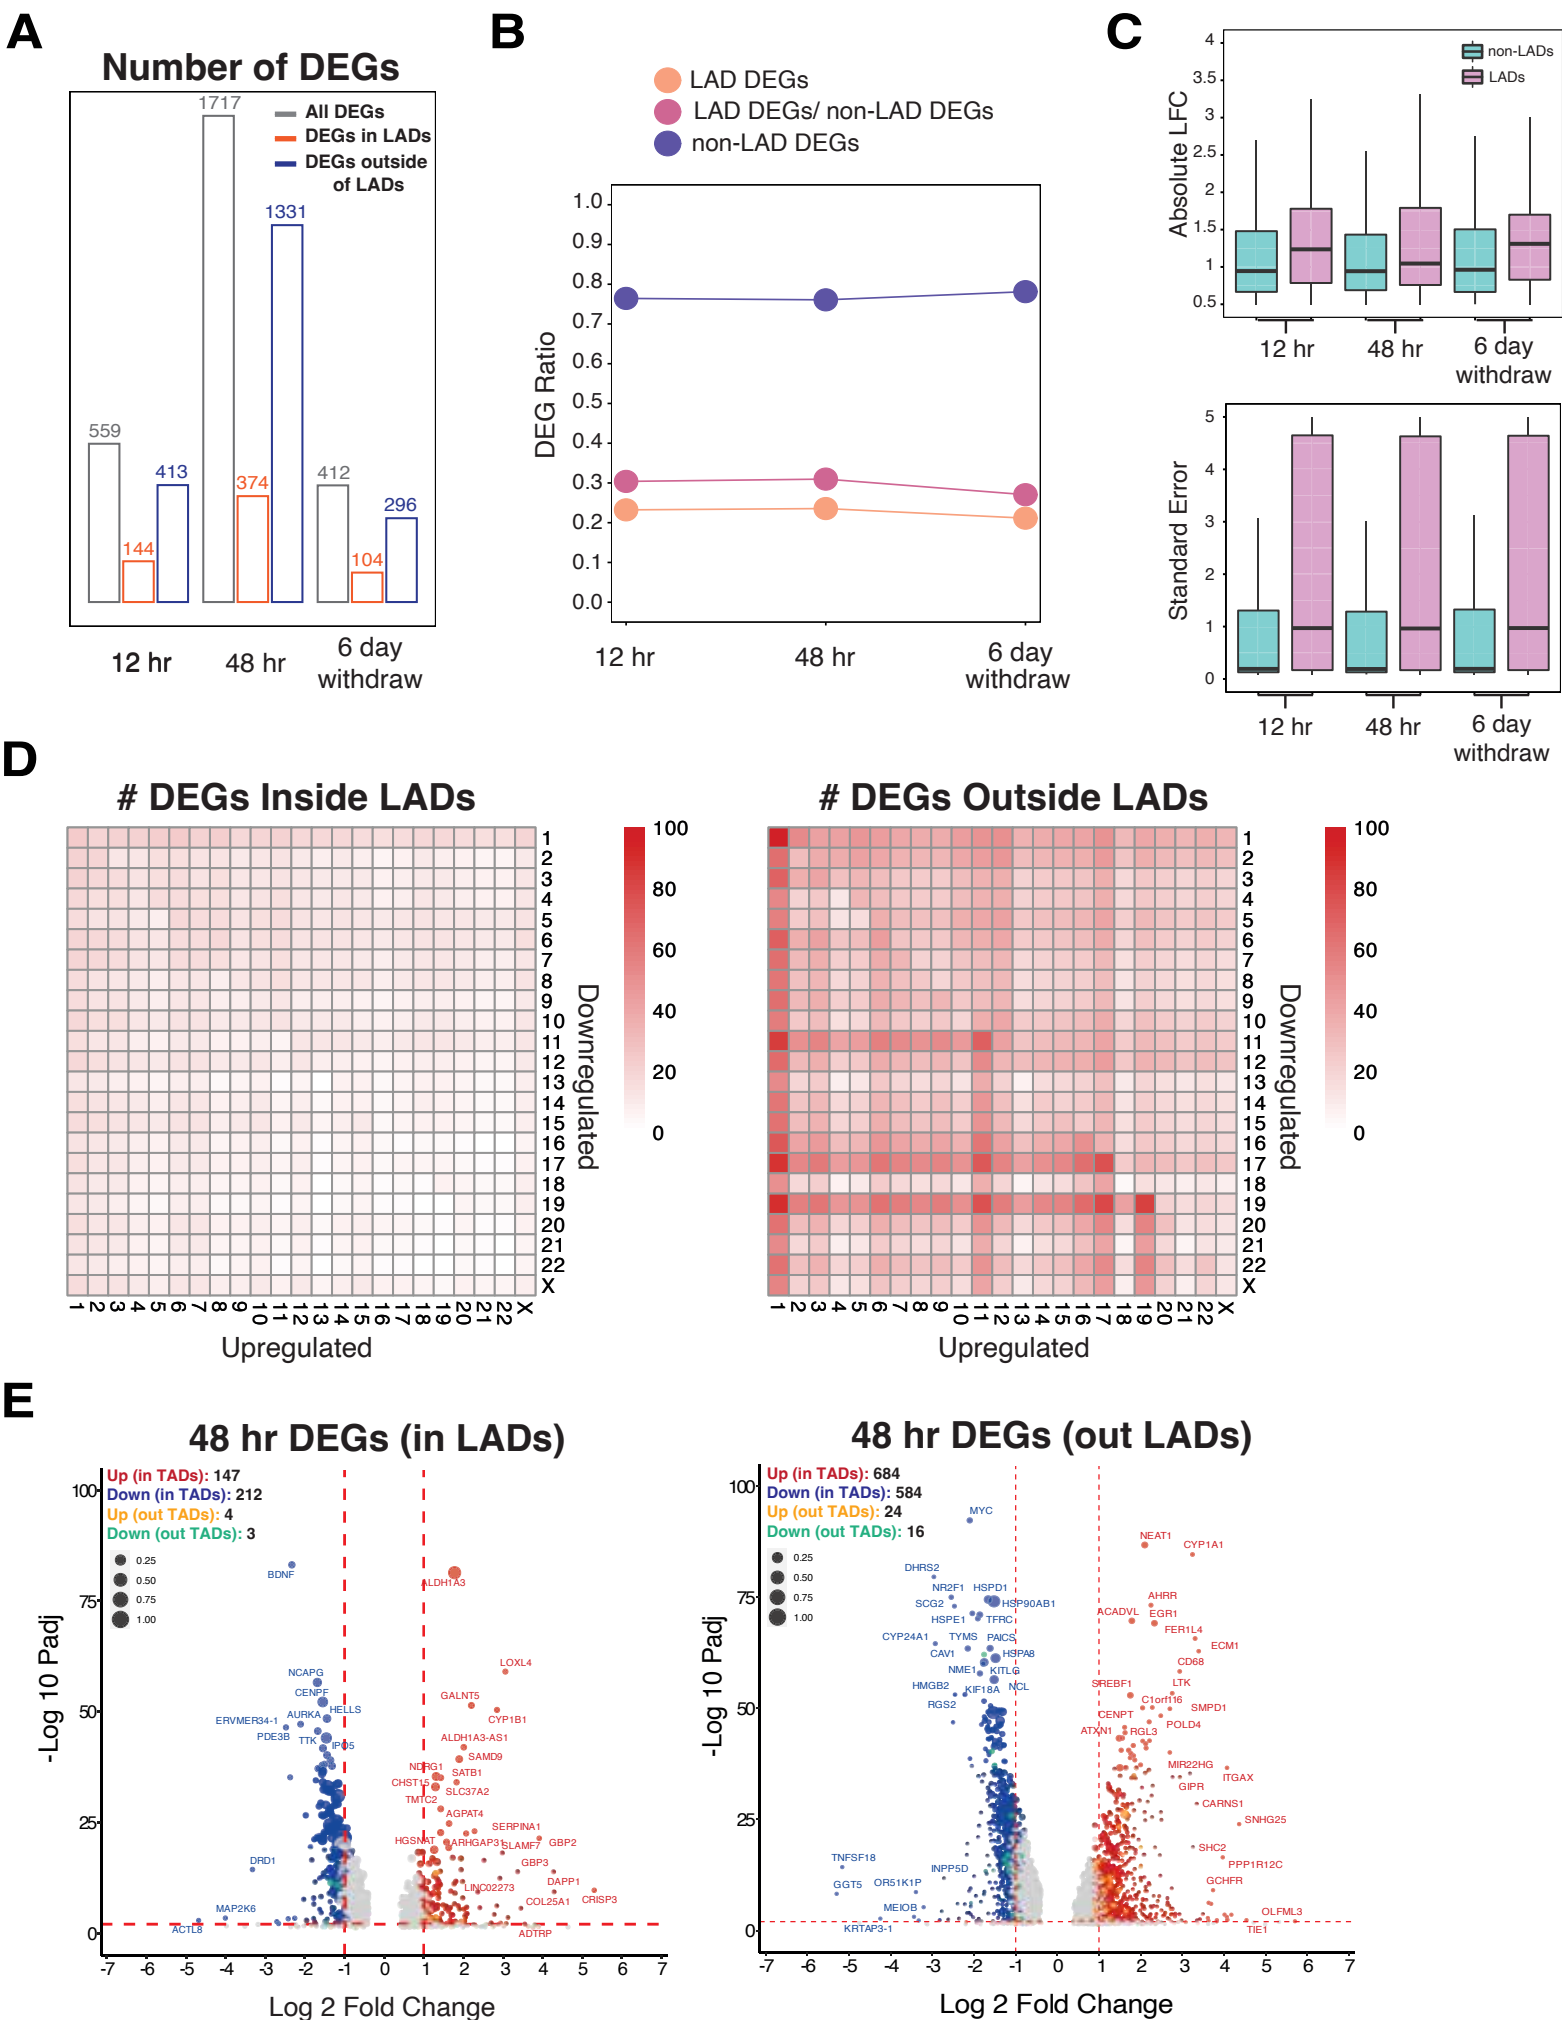

## Fig. S7

### Degradation of B-type lamins promotes differential gene expression near LAD boundaries.

- A. Bar plot showing the number of all DEGs compared to the number of DEGs within versus outside of LAD boundaries defined by publicly available DamID data for all three auxin treatment conditions (adjusted P value < 0.01 and absolute log fold change > 1).
- B. Dot plot showing the ratios of DEGs within LADs, outside of LADs, and all DEGs.
- C. Box plot showing the absolute log fold change and standard error for DEGs within LADs and outside of LADs for all three auxin treatment conditions.
- D. Heatmaps showing the number of DEGs within and outside of LADs in relation to their upregulation or downregulation.
- E. Volcano plots showing DEGs within and outside of LADs in relation to TADs after 48 hours of auxin treatment (adjusted P value < 0.01 and absolute log fold change > 1). “Up” refers to upregulated genes and “Down” refers to downregulated genes.

Fig. S8

A

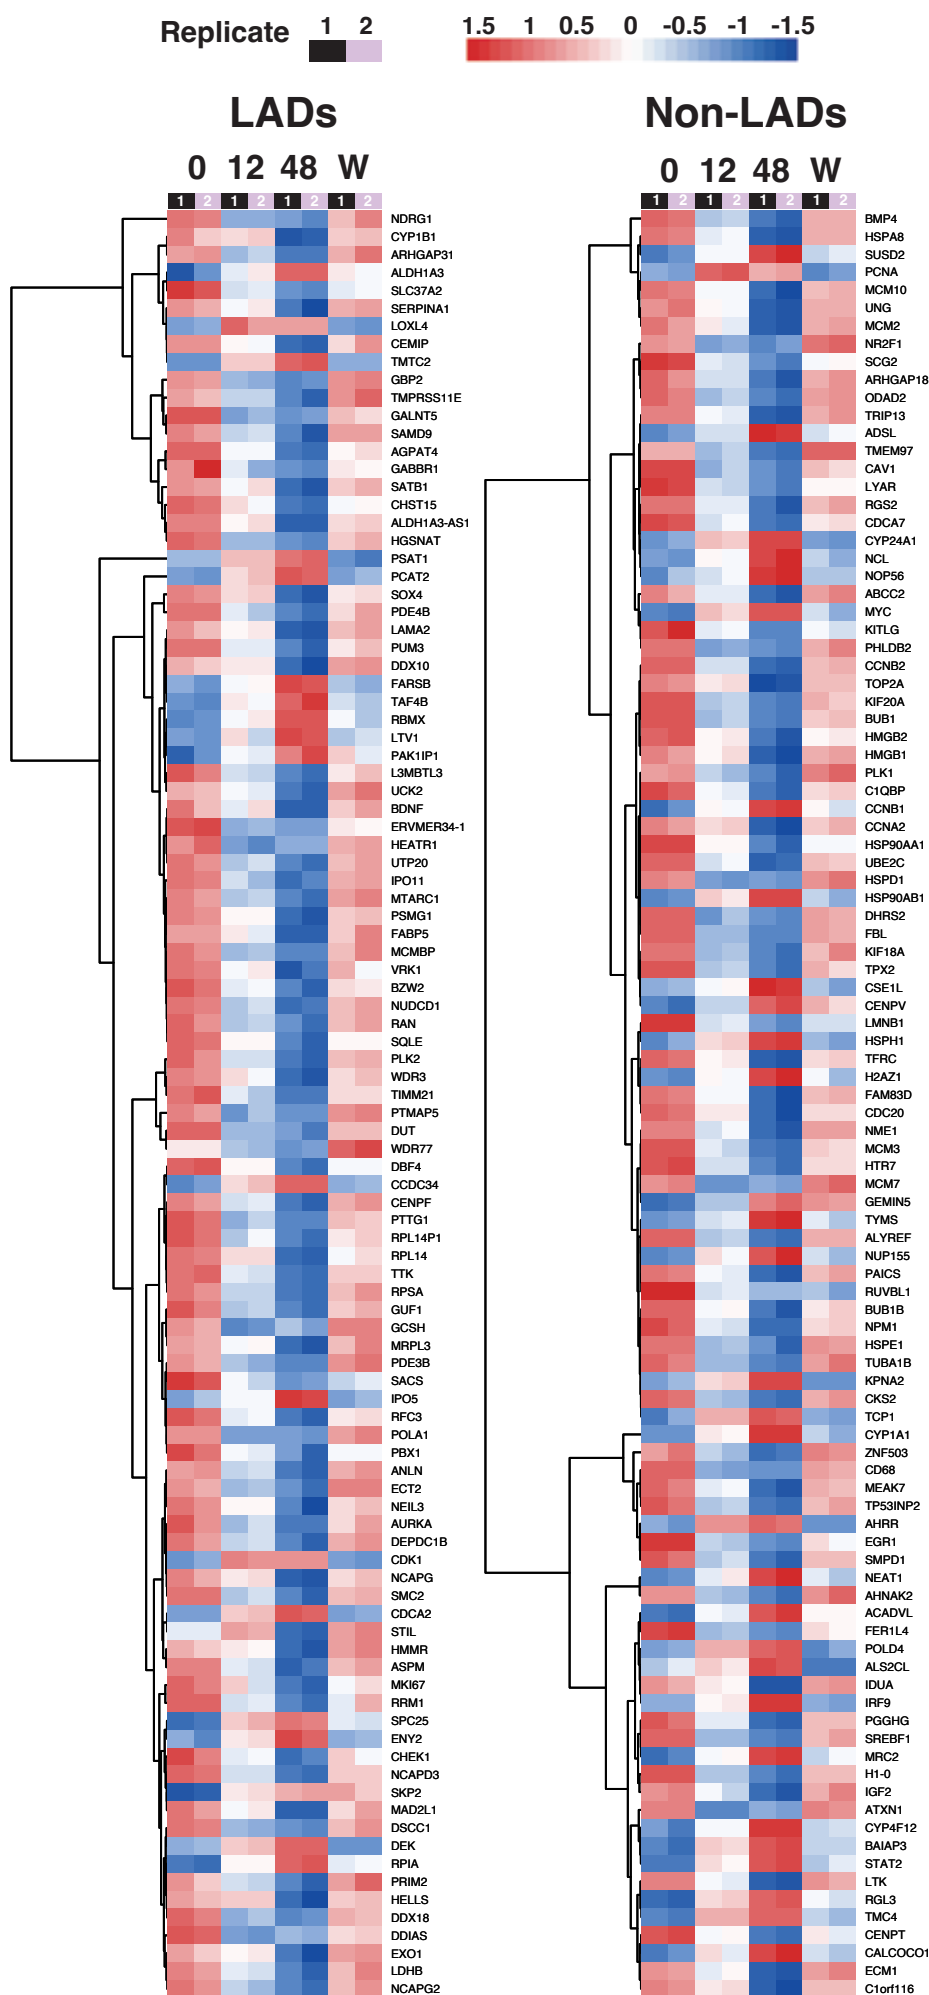

B

**DisGeNET, 12 hours within LADs: Structural**

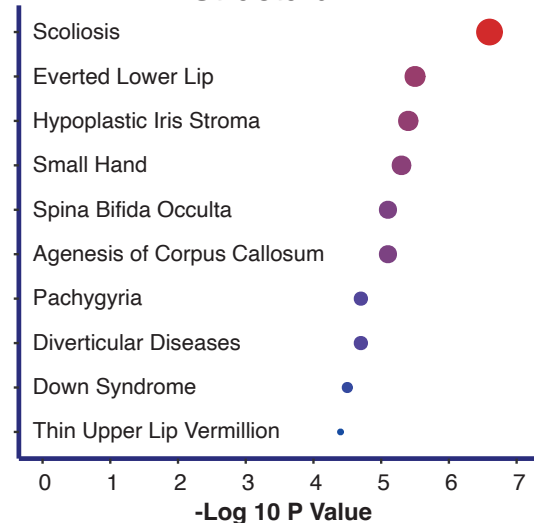

**DisGeNET, 12 hours within LADs: Cancer**

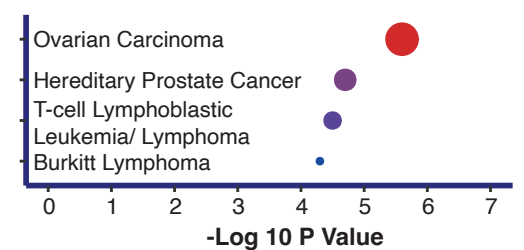

C

**DisGeNET, 12 hours outside LADs: Cancer**

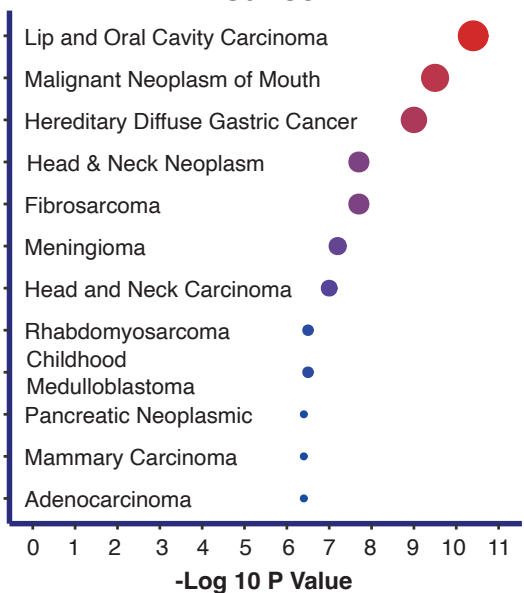

**DisGeNET, 12 hours outside LADs: Structural**

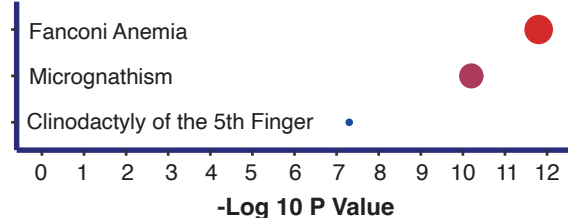

## **Fig. S8**

### **Degradation of B-type lamins promotes differential gene expression near LAD boundaries.**

- A. Heatmaps showing the top 100 DEGs within versus outside of LAD boundaries upon 48 hours of auxin treatment defined by publicly available DamID data (adjusted P value < 0.01 and absolute log fold change > 1).
- B. DisGeNET results indicate terms upon 12 hours of auxin treatment within LADs related to structural changes and cancer.
- C. DisGeNET results indicate terms upon 12 hours of auxin treatment outside of LADs related to cancer and structural changes.



**Fig. S9****A****48 Hours | Chr1-Chr18**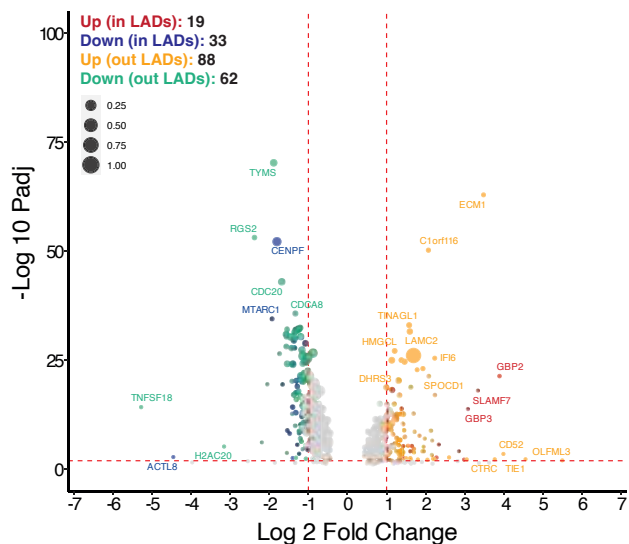**48 Hours | Chr2-Chr19**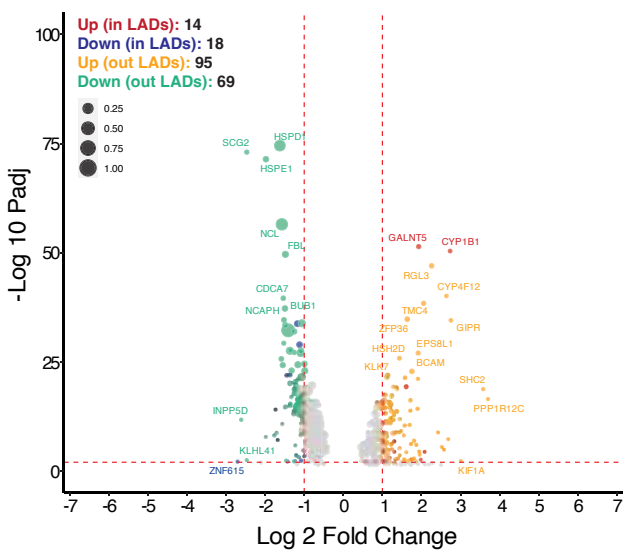**48 Hours | Chr15-Chr22**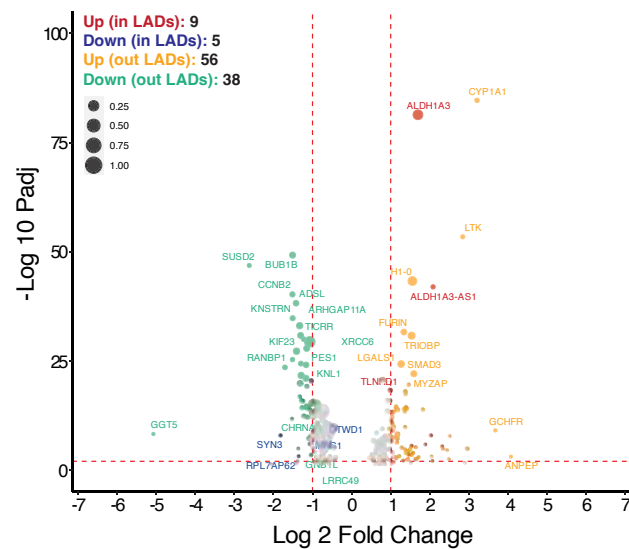**B****Interchromosomal Contact Density In LADs**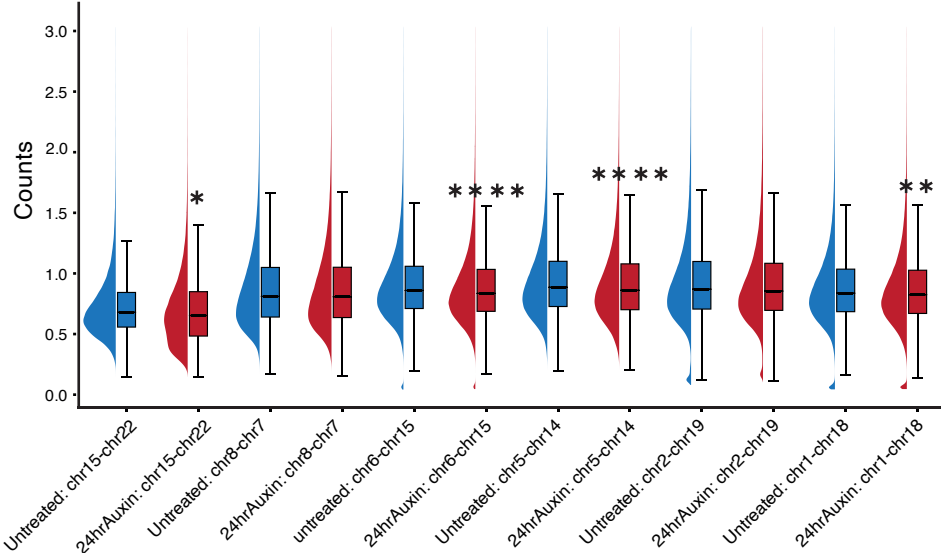**Interchromosomal Contact Density Outside LADs**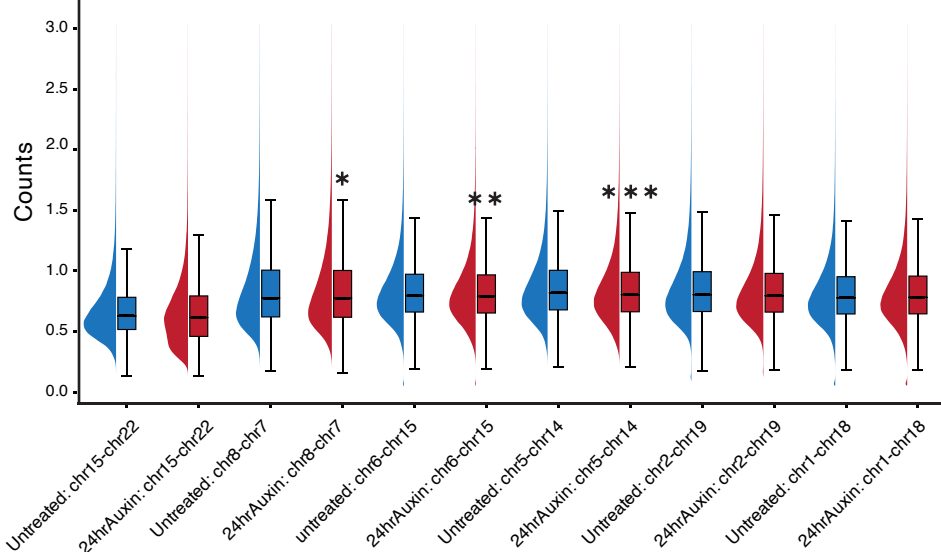**C**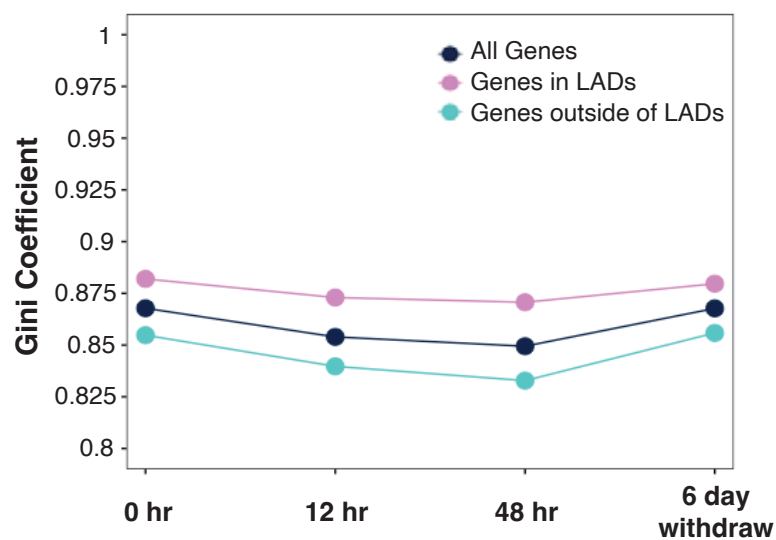

## Fig. S9

### **Chromosomes with decreased interaction frequencies had more DEGs outside LADs.**

- A. Volcano plots showing DEGs specific to chromosome pairs with decreased interaction frequency within and outside of LADs 48 hours of auxin treatment (adjusted P value < 0.01 and absolute log fold change > 1). “Up” refers to upregulated genes and “Down” refers to downregulated genes.
- B. Raindrop plot comparing interchromosomal contact frequencies for the control and 24-hour treatment conditions. Error bars: SEM. Data was pooled from two independent biological replicates (N = 2). Significance was calculated by unpaired t test (\*\*<0.01).
- C. Dot plot showing the Gini coefficient as a measure of transcriptional divergence for all three conditions.
